1 **Article's category: Research Article**

2 **Title**

3 Improving tuberculosis surveillance by detecting international transmission using publicly available  
4 whole-genome sequencing data

5

6 **Authors**

7 Andrea Sanchini<sup>1,\*</sup>, Christine Jandrasits<sup>2,\*</sup>, Julius Tembrockhaus<sup>2</sup>, Thomas Andreas Kohl<sup>3,4</sup>, Christian  
8 Utpatel<sup>3,4</sup>, Florian P. Maurer<sup>5</sup>, Stefan Niemann<sup>3,4</sup>, Walter Haas<sup>1</sup>, Bernhard Y. Renard<sup>2</sup>, Stefan Kröger<sup>1</sup>

9

10 **Affiliations**

11 <sup>1</sup> Respiratory Infections Unit (FG36), Department of Infectious Disease Epidemiology, Robert Koch  
12 Institute, Berlin, Germany

13 <sup>2</sup> Bioinformatics Unit (MF1), Department of Methodology and Research Infrastructure, Robert Koch  
14 Institute, Berlin, Germany

15 <sup>3</sup> Molecular and Experimental Mycobacteriology, Research Center Borstel, Borstel, Germany

16 <sup>4</sup> German Center for Infection Research (DZIF), partner site Hamburg - Lübeck - Borstel -  
17 Riems, Germany

18 <sup>5</sup> National and WHO Supranational Reference Laboratory for Mycobacteria, Research Center Borstel,  
19 Borstel, Germany

20 \* Equal contribution

21

## 22 Corresponding author information

23 Bernhard Y. Renard, RenardB@rki.de

24 Bioinformatics Unit (MF1), Department of Methodology and Research Infrastructure,

25 Robert Koch Institute, Berlin, Germany

26

## 27 Abstract

28 Introduction: Improving the surveillance of tuberculosis (TB) is especially important for multidrug-  
29 resistant (MDR) and extensively drug-resistant (XDR)-TB. The large amount of publicly available  
30 whole-genome sequencing (WGS) data for TB gives us the chance to re-use data and to perform  
31 additional analysis at a large scale.

32 Aim: We investigated to what extent we could use globally available WGS raw data of MDR/XDR-TB  
33 isolates available from the public sequence repositories to improve TB surveillance.

34 Methods: We extracted raw WGS data and the related metadata of *Mycobacterium tuberculosis*  
35 isolates available from the Sequence Read Archive. We compared this public dataset with WGS data  
36 and metadata of 131 MDR- and XDR-TB isolates from Germany in 2012-2013.

37 Results: We aggregated a dataset that includes 1,081 MDR and 250 XDR isolates among which we  
38 identified 133 molecular clusters. In 16 clusters, the isolates were from at least two different  
39 countries. For example, cluster2 included 56 MDR/XDR isolates from Moldova, Georgia, and  
40 Germany. By comparing the WGS data from Germany and the public dataset, we found that 11  
41 clusters contained at least one isolate from Germany and at least one isolate from another country.  
42 We could, therefore, connect TB cases despite missing epidemiological information.

43 Conclusion: We demonstrated the added value of using WGS raw data from public repositories to  
44 contribute to TB surveillance. By comparing the German and the public dataset, we identified

45 potential international transmission events. Thus, using this approach might support the  
46 interpretation of national surveillance results in an international context.

47

## 48 **Keywords**

49 *Mycobacterium tuberculosis*

50 Molecular epidemiology

51 Molecular surveillance

52 Multidrug-resistant tuberculosis

53 Extensively drug-resistant tuberculosis

54 Genomic sequencing data

55 Public repositories

56 Molecular cluster

57

## 58 **Introduction**

59 Improving the surveillance of Tuberculosis (TB) is one of the eight core activities identified by the  
60 World Health Organization (WHO) and the European Respiratory Society to achieve TB elimination,  
61 defined as less than one incident case per million [1]. Monitoring transmission is especially important  
62 for multidrug-resistant (MDR)-TB isolates – defined as being resistant to rifampicin and isoniazid –  
63 and for extensively drug-resistant (XDR)-TB isolates – defined as MDR-TB isolates with additional  
64 resistant to at least one of the fluoroquinolones and to at least one of the second-line injectable  
65 drugs. In 2017, the WHO estimated that worldwide more than 450,000 people fell ill with MDR-TB  
66 and among these, more than 38,000 fell ill with XDR-TB [2].

67 The rapid advance in molecular typing technology – especially the availability of whole-genome  
68 sequencing (WGS) to identify and characterize pathogens – gives us the chance of integrating this  
69 information into the disease surveillance. For TB surveillance it is possible to combine the results of  
70 molecular typing of *Mycobacterium tuberculosis* complex isolates with traditional epidemiological  
71 information to infer or to exclude TB transmission [3, 4]. This is of particular relevance if transmission  
72 occurs among multiple countries, where epidemiological data such as social contacts are more  
73 difficult to get and where data exchange is more difficult to organize. The European Centre for  
74 Disease Prevention and Control (ECDC) identified 44 events of international transmission  
75 (international clusters) of MDR-TB isolates collected in different European countries between 2012  
76 and 2015 [5]. In this example, the authors inferred TB transmission using the mycobacterial  
77 interspersed repetitive units variable number of tandem repeats (MIRU-VNTR) typing method.  
78 However, this method has limitations such as low correlation with epidemiological information in  
79 outbreak settings and low discriminatory power [3, 6]. In comparison, WGS analysis offers a much  
80 higher discriminatory power and allows for inferring (or excluding) TB transmission at a higher  
81 resolution [4]. In a recent systematic review, van der Werf and co-authors identified three studies  
82 that used WGS to investigate the international transmission of TB [7].

83 In recent years, the amount of WGS data available is increasing, especially due to the reduction of  
84 sequencing costs [8]. In addition, more and more authors deposit the raw data of their projects in  
85 open access public repositories such as the Sequence Read Archive (SRA) of the National Center for  
86 Biotechnology Information (NCBI) [9]. These raw WGS data of thousands of isolates – together with  
87 their public availability – enable the re-use and the additional analysis at a large and global scale from  
88 different perspectives [10]. However, standards in bioinformatics analysis and interpretation of these  
89 WGS data for surveillance purposes are not yet fully established [11]. In addition, it is still unclear if  
90 and how far we can use this high amount of publicly available data to improve TB surveillance.

91 Our aim was to investigate to what extent we could use raw WGS data of global MDR/XDR-TB  
92 isolates available from public repositories for TB surveillance. Specifically, we wanted to identify

93 potential international events of TB transmission and to compare the international isolates with a  
94 collection of *M. tuberculosis* isolates collected in Germany in 2012-2013.

95

## 96 **Methods**

### 97 *Data collection: public dataset*

98 The SRA database is a public repository provided by the NCBI (U.S. National Library of Medicine,  
99 Bethesda, USA) which stores raw sequencing data derived from high-throughput sequencing  
100 platforms [9]. We queried the repository for the pathogen “*Mycobacterium tuberculosis*” and  
101 restricted the results to “genomic”, “WGS” data from the “Illumina” sequencing technology using the  
102 appropriate query keywords. After excluding single-end sequenced and missing raw data, 8,716  
103 isolates remained, which were further filtered for sequence characteristics. We excluded samples  
104 with reads shorter than 100 bp, as well as samples with a relatively low (< 20x) or high (> 500x)  
105 average coverage depth of the reference genome (see below) to obtain a more homogenous dataset.  
106 In addition, we excluded samples with less than 90% reads aligned to the reference genome to  
107 prevent having contaminated or incorrectly annotated samples in the set. Samples for which over  
108 50% of all single-nucleotide variant calls were inconclusive were also excluded (see Supplementary  
109 Material for details). To identify duplicates (e.g. the same file uploaded more than once in different  
110 projects) within the public dataset, we compared numbers of reads and detected variants at every  
111 step of the analysis. We excluded samples that were identical in all those numbers and their  
112 corresponding epidemiological data. After all filtering steps, 7,620 isolates remained and we will  
113 refer to these isolates as the “public dataset” throughout the manuscript. In addition to the raw  
114 reads, we also collected metadata available in the SRA repository [9] (for details see Supplementary  
115 Table S1).

116

# *Data collection: German dataset*

In addition to the international public dataset, we analyzed isolates from Germany, which will be referred to as “German dataset” throughout the manuscript. The German dataset includes all *M. tuberculosis* complex isolates processed at the National Reference Center for Mycobacteria (*Forschungszentrum Borstel*, Germany) and classified as MDR-TB or XDR-TB in 2012-2013 by drug susceptibility tests (DST) according to the German TB surveillance system. We extracted the epidemiological data available for the *M. tuberculosis* complex isolates using the laboratory ID of the National Reference Center for Mycobacteria. Then, we identified the respective isolate in the national surveillance system at the Robert Koch Institute (the German public health institute) and thus matched molecular with epidemiological data. We collected information on year of isolation, federal state of isolation, DST results, and patient-related information such as age, gender, citizenship, and country of birth. Ethical approval was not required for this study since data were extracted from anonymized notification data.

# *NGS analysis workflow*

Raw reads were subjected to quality control with Trimmomatic [12] and Flash [13]. The trimmed and filtered reads were mapped to two different reference genomes: the *M. tuberculosis* H37Rv strain and a pan-genome reference built from 146 *M. tuberculosis* genomes [14, 15] with bwa mem [16]. Duplicated reads were marked and reads with mapping quality less than 10 were excluded. The Genome Analysis Toolkit (GATK) [17] was used for variant detection mapped to both reference genomes and extracted all SNPs of high quality (see Supplementary Material for details).

# *Drug-resistance prediction*

We used Phyresse [18] and TBDreamDB [19] to identify drug-resistance mutations in our datasets (last access October 18<sup>th</sup>, 2018). We filtered both lists to include only single nucleotide substitutions. For TBDreamDB we mapped the provided locations within resistance genes to positions on the *M. tuberculosis* H37Rv genome where necessary. We excluded mutations not associated with drug-resistance according to the WHO [20] and to the CRYPTIC study (see Supplementary Table S2 for the list of all identified mutations and, among those, all the excluded mutations). We intersected this list of mutations with the variants detected from reads mapped to the *M. tuberculosis* H37Rv genome from each sample to identify resistance-associated mutations within samples. We also identified uncovered or low-quality regions that overlap with locations of resistance mutations. For the classification of isolates into resistance classes (MDR-TB and XDR-TB), we used the definitions of the WHO [2].

# *Molecular clustering*

We used PANPASCO [15] to calculate relative pairwise SNP distance between all isolates classified as MDR-TB or XDR-TB in the public and German dataset. This method builds on two parts to enable distance calculation for large, diverse datasets: mapping all reads to a computational pan-genome including 146 *M. tuberculosis* genomes and distance calculation for each individual pair of samples. For this, we identified all positions with high quality for each pair of samples and calculated the SNP distance based on this set of positions (for details on the filtering workflow, PANPASCO and distance calculation see Supplementary Material). SNPs in repeat-rich genes were not used for distance calculations as studies have shown that variants found in these regions are often false positives [3, 21]. The list of genes provided by Comas et al. [22] was used for filtering. We applied single-linkage agglomerative clustering for defining transmission clusters and used a threshold of fewer than 13 SNPs, based on a previous study [23]. PANPASCO calculates distances based on data available for each pair separately. For this reason, an individual sample can potentially

have small distances to samples that have a much greater distance in direct comparison, due to a higher number of compared high-quality sites. In this study, we aimed to discover clusters of closely related samples. Therefore, the implemented agglomerative clustering approach evaluates the distance from the sample that should be added to two instead of one sample of an existing cluster – we did not only compare pairs of samples but two sets of trios. The sample was added to the cluster only if the maximum distance in the trio was below twice the SNP threshold. Samples that violated this condition were iteratively removed from the clustering and were marked for potential follow-up analyses.

We used Cytoscape 3.7 to visualize the clusters [24]. We classified all clustered samples into TB lineages using lineage-specific SNPs provided in [25] and [26] (see Supplementary Table S6). We compared and validated clustering results of a subset of isolates using the pipeline MTBSeq [27] (see Supplementary Table S7).

## Results

### *Final dataset*

After the filtering steps, 7,620 of initially 8,716 downloaded isolates remained in the public dataset and 131 isolates from the German dataset (Figure 1). We focused our study on MDR/XDR-TB, and therefore the final dataset contained overall 1,335 isolates after filtering using resistant associated SNPs. Supplementary Table S1 shows the cluster assignment, molecular drug-resistance prediction and extracted metadata of these 1,335 isolates.

### *Metadata availability and drug-resistance prediction: public dataset (N=1,204)*

The majority of metadata collected from the public dataset consisted of the country of isolation (1,049/1,204, 87.13 %), the year of isolation (921/1,204, 76.49 %) and the source of the isolate (997/1,204, 82.81 %) (Table 1). For other metadata we could collect less information, for example in



the case of patient age (174/1,204, 14.45 %), patient gender (171/1,204, 14.20 %), or patient HIV status (157/1,204, 13.04 %) (Supplementary Table S1). For 912 isolates, we had information on both country and year of isolation. Initially, we identified 336 isolates with missing data for the country of isolation. After examining the Bioproject information (SRA, [9]) of these 332 isolates, we could further identify the country of isolation of 177 isolates. We identified 970/1,204 MDR (80.56 %) and 234/1,204 XDR (19.44 %) isolates.

#### *Metadata availability and drug-resistance prediction: German dataset (N=131)*

We could retrieve demographics, epidemiological information and DST results for 129/131 (98.47 %) of the isolates from the German TB surveillance system. Table 2 and Supplementary Table S3 show the collected metadata. The 131 German isolates came from 15/16 (93.75 %) of the German federal states. The most frequent countries of birth of the patients were Russia (27/131, 20.61 %), Germany (19/131, 14.50 %) and Romania (10/131, 7.63%) (Table 2).

We identified discrepancies in the identification of rifampicin resistance between the results of the phenotypic DST and the detection of drug-resistance mutations in 13 isolates (Supplementary Table S3). Specifically, four isolates were classified as MDR in the TB surveillance system (isolates 4556-12, 9165-12, 72-13 and 14102-13) while they were classified as non-MDR according to the molecular analysis, due to the absence of any drug-resistance mutations against rifampicin. However, in one of these four isolates (isolate 72-13), we found insufficient sequencing coverage in some of the genomic regions with known resistance mutations for rifampicin; while in another isolate (isolate 14102-13) we found an insertion of 3 nucleotides near a region with known resistance mutations for rifampicin. In addition, nine isolates were classified as MDR in the TB surveillance system (isolates 11355-13, 2955-12, 3007-13, 4245-13, 5096-13, 5190-13, 7712-13, 8291-13 and 8565-12), while they were classified as XDR according to the analysis of the drug-resistance mutations. The reason for such discrepancy was that a drug-resistance mutation against amikacin, kanamycin or capreomycin was identified in these ten isolates, but no DST results were available for these antibiotics.

## *Molecular clustering and comparison between the public and the German dataset*

Among all the isolates of our study, we identified 133 molecular clusters – with at least 2 isolates – and 591 singletons. The 133 clusters included 744 isolates (Supplementary Table S4). Supplementary Table S5 shows a summary of distances between all isolates for all molecular clusters. In 16 clusters, the isolates were from at least two different countries of isolation, suggesting larger events of international transmission of TB (Supplementary Table S4). For example, cluster2 included 56 MDR/XDR isolates from three countries – Moldova, Georgia and Germany. A total of 51/56 isolates in this cluster were part of a previous study (Bioproject PRJNA318002, [28], Supplementary Table S1). In Figure 2 we show the country of isolation and the year of isolation of the isolates belonging to cluster2.

Cluster1 is the largest cluster (n=79) identified in our study. According to the metadata (such as host subject, isolate name, year of isolation, patient age, and patient gender, see Supplementary Table S1), the isolates were 79 autopsy samples from different anatomic sites (such as lung or liver) of the same patient, marked as “P21”. Similarly, cluster3, cluster14, cluster16, cluster18 and cluster28 contained multiple isolates from single patients from South Africa, which were part of a study including 2,693 autopsy samples of 44 subjects [29]. In line with previous findings [29], our analysis showed very low variability within these clusters (Supplementary Table S5). In addition, the analysis of the respective metadata revealed that cluster26, cluster32 and cluster33 included multiple isolates from single patients. These isolates were part of a study investigating the evolution of drug-resistant TB in patients during long-term treatment [30].

When we compared the German dataset with the public dataset, we observed that in 11 clusters there was at least one isolate from Germany and at least one isolate from another country. Table 3 shows the relation between the German isolates and the international isolates from the public dataset. The epidemiological information collected from the German isolates correlates well with molecular clusters in 7/11 cases. For example, in cluster9 there were 16 isolates from Georgia and

two isolates from Germany; the country of birth recorded for one of these two isolates from Germany was Georgia. Moreover, cluster24, cluster35, and cluster103 included isolates from Georgia and Germany, and the country of birth recorded for the isolates from Germany was Georgia. Three further examples of agreement between molecular and epidemiological data were: the cluster13, which included isolates from Germany and Kazakhstan, the cluster53, which included isolates from Germany and from Romania and the cluster58, which included isolates from Germany and from India (Table 3). By comparing the molecular data of the German and of the public dataset, we could connect previously epidemiologically unlinked cases. For example, in the cluster2 (Figure 2) two isolates from Germany (in orange) were connected through several isolates from Georgia and Moldova (in dark and light blue), and the distance between the two German isolates was >13 SNPs. Similarly, in the cluster53 two isolates from Romania were connected through a German isolate, and the distance between the two isolates from Romania was > 13 SNPs (data not shown).

## **Data availability**

The raw whole genome sequencing data used in this study are available in the NCBI SRA repository. The accession numbers for all samples of the public dataset are available in the Supplementary Table 1. The German dataset is available as Bioproject PRJEB35201. Software for creating a pan-genome sequence (seq-seq-pan) is accessible at [https://gitlab.com/rki\\_bioinformatics/seq-seq-pan](https://gitlab.com/rki_bioinformatics/seq-seq-pan) and scripts for the NGS workflow and the SNP-distance method (PANPASCO) are available at [https://gitlab.com/rki\\_bioinformatics/panpasco](https://gitlab.com/rki_bioinformatics/panpasco). The code for the clustering method is available at [https://gitlab.com/rki\\_bioinformatics/snp\\_distance\\_clustering](https://gitlab.com/rki_bioinformatics/snp_distance_clustering).

## **Discussion**

In this study, we investigated to what extent WGS data of MDR/-XDR-TB isolates available from public sequence repositories can be used for improving TB surveillance. We identified several

molecular clusters including isolates from multiple countries, suggesting larger events of international transmission of TB. We expected to find international TB-transmission events, also considering previous studies reporting cross-border molecular clusters [5, 7]. Looking at the collected metadata, we identified several clusters with multiple isolates from the same patient or multiple autopsy samples collected from the same patient [29, 30]. This shows the importance of providing complete metadata together with the publicly available molecular data. Based on the metadata, we could distinguish between clusters of isolates taken from different patients – the “real” transmission clusters – and clusters of isolates taken from a single patient. The real transmission clusters are crucial for the routine TB surveillance, while the clusters of isolates taken from the same patient are useful to study the intra-host variability of isolates.

We observed agreement between molecular and epidemiological data by comparing the public and the German datasets. This is clear for example in the clusters containing isolates from both the German dataset and the public dataset originating from Georgia. It is therefore likely that migrants from Georgia acquired the TB infections in their country – or during visits there – and were diagnosed later when they moved or returned to Germany, as already described [31]. This shows that we could identify events of potential international transmission (between Germany and Georgia), that we could have missed by looking only at the German molecular clusters.

We observed discrepancies in the identification of rifampicin resistance between the results of the phenotypic DST and the detection of drug-resistance mutations. Specifically, four isolates were phenotypically resistant to rifampicin but they did not contain any known drug-resistance mutation against rifampicin or the genetic regions containing the known mutation had lower sequencing quality. This means that in our study the drug-resistance mutations correctly predicted the resistance to rifampicin in 125/129 of the isolates, resulting in a sensitivity of 96.90 %. This sensitivity is in accordance with a study by the CRYPTIC Consortium, where the authors reported a sensitivity of 97.50 % [32]. The incorrect identification of rifampicin resistance misclassified four isolates which were MDR by phenotype, but non-MDR by genotype. This might have had consequences for patient

therapy if we would have replaced the phenotypic DST with the molecular detection of drug-resistance mutations. Therefore, we suggest being careful in the transition from phenotypic to genotypic drug-resistance determination as suggested by the CRYPTIC Consortium [32]. Specifically, laboratories and national reference laboratories should still perform the phenotypic DST, for example on a representative set of isolates or on isolates with low sequencing quality and coverage.

Our study has one major implication: we demonstrated that by considering the international context (the public dataset), while analysing the national molecular data (the German dataset), we could identify previously unknown transmissions between patients. Thus, we could detect larger and international events of TB transmission. To improve the WGS-based TB surveillance we, therefore, suggest to regularly compare the national molecular clusters with the international molecular clusters available in the public sequence repositories.

Our study has two major limitations: first, the raw WGS data uploaded in the SRA repository [9] were either from single studies or from outbreaks, and therefore they were not representative of the TB situation in the different countries. This sampling bias is, however, a well-known bias in molecular epidemiology studies [33]. Second, the metadata collected were incomplete, especially regarding patient information. Both limitations can be overcome by genotyping all TB isolates, by including the genotyping results in the TB surveillance systems and by making genotyping data publicly available.

In conclusion, we demonstrated that using WGS data from public repositories improved the surveillance of TB. The comparison between the German and the international molecular clusters was indeed useful to identify potential international events of transmission. Kohl and co-authors suggested a similar approach and used the core genome multilocus sequence typing to detect clusters [34]. Lastly, supranational institutions such as the WHO, the ECDC or international TB networks could perform such analysis at a global scale, improving the global surveillance of TB.

## Acknowledgements

We would like to thank Birgit Voß for her help in matching epidemiological and molecular data. We want to thank the National Reference Center for Mycobacteria in Borstel, Germany for acquiring the sequencing data for the German dataset. We thank Lena Fiebig and Marta Andrés for their initial input in the study.

### **Conflict of interest**

None declared.

### **Authors' contributions**

Andrea Sanchini: participated in the study design, participated in the data collection, analyzed the data, interpreted the results and wrote the manuscript.

Christine Jandrasits: designed the study, collected the data, analyzed the data, interpreted the results and wrote the manuscript.

Julius Tembrockhaus: collected the data, analyzed the data and revised the manuscript.

Thomas Andreas Kohl: participated in data analysis, and interpretation of the results, and revised the manuscript.

Christian Utpatel: participated in data analysis, interpretation of the results, and revised the manuscript.

Florian P. Maurer: participated in data analysis, and revised the manuscript.

Stefan Niemann: participated in study design and revised the manuscript.

Walter Haas: designed the study, participated in the interpretation of the results and revised the manuscript.

Bernhard Y. Renard: designed the study, participated in the interpretation of the results, coordinated the project and revised the manuscript.

Stefan Kröger: designed the study, participated in the data analysis, participated in the interpretation of the results, coordinated the project and revised the manuscript.

## References

1. Matteelli A, Rendon A, Tiberi S, Al-Abri S, Voniatis C, Carvalho ACC, et al. Tuberculosis elimination: where are we now? *Eur Respir Rev.* 2018; 27(148).
2. World Health Organization: Global tuberculosis report 2018. Available from <https://apps.who.int/iris/bitstream/handle/10665/329368/9789241565714-eng.pdf?ua=1> 2019.
3. Roetzer A, Diel R, Kohl TA, Ruckert C, Nubel U, Blom J, et al. Whole genome sequencing versus traditional genotyping for investigation of a *Mycobacterium tuberculosis* outbreak: a longitudinal molecular epidemiological study. *PLoS Med.* 2013;10(2):e1001387.
4. Hatherell HA, Colijn C, Stagg HR, Jackson C, Winter JR, Abubakar I. Interpreting whole genome sequencing for investigating tuberculosis transmission: a systematic review. *BMC Med.* 2016;14:21.
5. ECDC. Molecular typing for surveillance of multidrug-resistant tuberculosis in the EU/EEA. . Available from: <http://ecdceuropa.eu/en/publications/Publications/MDR-TB-molecular-typing-surveillance-mar-2017pdf> 2017.
6. Wyllie DH, Davidson JA, Grace Smith E, Rathod P, Crook DW, Peto TEA, et al. A Quantitative Evaluation of MIRU-VNTR Typing Against Whole-Genome Sequencing for Identifying *Mycobacterium tuberculosis* Transmission: A Prospective Observational Cohort Study. *EBioMedicine.* 2018;34:122-130.
7. van der Werf MJ, Ködmön C. Whole-Genome Sequencing as Tool for Investigating International Tuberculosis Outbreaks: A Systematic Review. *Frontiers in Public Health.* 2019;7(87).
8. Muir P, Li S, Lou S, Wang D, Spakowicz DJ, Salichos L, et al. The real cost of sequencing: scaling computation to keep pace with data generation. *Genome Biol.* 2016;17:53.
9. Leinonen R, Sugawara H, Shumway M, Collaboration obotINSID. The Sequence Read Archive. *Nucleic Acids Research.* 2010;39(suppl\_1):D19-D21.
10. Ohta T, Nakazato T, Bono H. Calculating the quality of public high-throughput sequencing data to obtain a suitable subset for reanalysis from the Sequence Read Archive. *Gigascience.* 2017;6(6):1-8.
11. Meehan CJ, Goig GA, Kohl TA, Verboven L, Dippenaar A, Ezewudo M, et al. Whole genome sequencing of *Mycobacterium tuberculosis*: current standards and open issues. *Nat Rev Microbiol.* 2019.
12. Bolger AM, Lohse M, Usadel B. Trimmomatic: a flexible trimmer for Illumina sequence data. *Bioinformatics.* 2014;30(15):2114-2120.
13. Magoč T, Salzberg SL. FLASH: fast length adjustment of short reads to improve genome assemblies. *Bioinformatics (Oxford, England).* 2011;27(21):2957-2963.
14. Jandrasits C, Dabrowski PW, Fuchs S, Renard BY. seq-seq-pan: building a computational pan-genome data structure on whole genome alignment. *BMC Genomics.* 2018;19(1):47.

- 383 15. Jandrasits C, Kröger S, Haas W, Renard BY. Computational Pan-genome Mapping and  
384 pairwise SNP-distance improve Detection of Mycobacterium tuberculosis Transmission  
385 Clusters. PLoS Comput Biol. Forthcoming 2019.
- 386 16. Li H. Aligning sequence reads, clone sequences and assembly contigs with BWA-MEM. arXiv  
387 preprint arXiv:13033997 2013.
- 388 17. DePristo MA, Banks E, Poplin R, Garimella KV, Maguire JR, Hartl C, et al. A framework for  
389 variation discovery and genotyping using next-generation DNA sequencing data. Nature  
390 genetics. 2011;43(5):491-498.
- 391 18. Feuerriegel S, Schleusener V, Beckert P, Kohl TA, Miotto P, Cirillo DM, et al. PhyResSE: a Web  
392 Tool Delineating Mycobacterium tuberculosis Antibiotic Resistance and Lineage from Whole-  
393 Genome Sequencing Data. J Clin Microbiol. 2015;53(6):1908-1914.
- 394 19. Sandgren A, Strong M, Muthukrishnan P, Weiner BK, Church GM, Murray MB. Tuberculosis  
395 drug resistance mutation database. PLoS Med. 2009;6(2):e2.
- 396 20. Miotto P, Tessema B, Tagliani E, Chindelevitch L, Starks AM, Emerson C, et al. A standardised  
397 method for interpreting the association between mutations and phenotypic drug resistance  
398 in Mycobacterium tuberculosis. Eur Respir J. 2017;50(6).
- 399 21. Roetzer A, Schuback S, Diel R, Gasau F, Ubben T, di Nauta A, et al. Evaluation of  
400 Mycobacterium tuberculosis typing methods in a 4-year study in Schleswig-Holstein,  
401 Northern Germany. J Clin Microbiol. 2011;49(12):4173-4178.
- 402 22. Comas I, Chakravarti J, Small PM, Galagan J, Niemann S, Kremer K, et al. Human T cell  
403 epitopes of Mycobacterium tuberculosis are evolutionarily hyperconserved. Nature genetics.  
404 2010;42(6):498-503.
- 405 23. Walker TM, Ip CL, Harrell RH, Evans JT, Kapatai G, Dedicoat MJ, et al. Whole-genome  
406 sequencing to delineate Mycobacterium tuberculosis outbreaks: a retrospective  
407 observational study. Lancet Infect Dis. 2013;13(2):137-146.
- 408 24. Shannon P, Markiel A, Ozier O, Baliga NS, Wang JT, Ramage D, et al. Cytoscape: a software  
409 environment for integrated models of biomolecular interaction networks. Genome research.  
410 2003;13(11):2498-2504.
- 411 25. Coll F, McNerney R, Guerra-Assuncao JA, Glynn JR, Perdigao J, Viveiros M, et al. A robust SNP  
412 barcode for typing Mycobacterium tuberculosis complex strains. Nat Commun. 2014;5:4812.
- 413 26. Merker M, Blin C, Mona S, Duforet-Frebourg N, Lecher S, Willery E, et al. Evolutionary history  
414 and global spread of the Mycobacterium tuberculosis Beijing lineage. Nat Genet.  
415 2015;47(3):242-249.
- 416 27. Kohl TA, Utpatel C, Schleusener V, De Filippo MR, Beckert P, Cirillo DM, et al. MTBseq: a  
417 comprehensive pipeline for whole genome sequence analysis of Mycobacterium tuberculosis  
418 complex isolates. PeerJ. 2018;6:e5895.
- 419 28. Rosenthal A, Gabrielian A, Engle E, Hurt DE, Alexandru S, Crudu V, et al. The TB Portals: an  
420 Open-Access, Web-Based Platform for Global Drug-Resistant-Tuberculosis Data Sharing and  
421 Analysis. J Clin Microbiol. 2017;55(11):3267-3282.
- 422 29. Lieberman TD, Wilson D, Misra R, Xiong LL, Moodley P, Cohen T, et al. Genomic diversity in  
423 autopsy samples reveals within-host dissemination of HIV-associated Mycobacterium  
424 tuberculosis. Nature Medicine. 2016;22:1470.
- 425 30. Xu Y, Liu F, Chen S, Wu J, Hu Y, Zhu B, et al. In vivo evolution of drug-resistant  
426 Mycobacterium tuberculosis in patients during long-term treatment. BMC Genomics.  
427 2018;19(1):640.
- 428 31. Odone A, Tillmann T, Sandgren A, Williams G, Rechel B, Ingleby D, et al. Tuberculosis among  
429 migrant populations in the European Union and the European Economic Area. Eur J Public  
430 Health. 2015;25(3):506-512.
- 431 32. Consortium CR, the GP, Allix-Beguec C, Arandjelovic I, Bi L, Beckert P, et al. Prediction of  
432 Susceptibility to First-Line Tuberculosis Drugs by DNA Sequencing. N Engl J Med.  
433 2018;379(15):1403-1415.



- 434 33. Murray M, Alland D. Methodological problems in the molecular epidemiology of  
435 tuberculosis. Am J Epidemiol 2002;155(6):565-571.
- 436 34. Kohl TA, Harmsen D, Rothganger J, Walker T, Diel R, Niemann S. Harmonized Genome Wide  
437 Typing of Tubercle Bacilli Using a Web-Based Gene-By-Gene Nomenclature System.  
438 EBioMedicine. 2018;34:131-138.

439

## Tables

**Table 1. Characteristics of the 1,204 multi- and extensively drug-resistant *Mycobacterium tuberculosis* isolates from the public dataset analyzed in this study.**

| Characteristic               |              | n   | %     |
|------------------------------|--------------|-----|-------|
| <b>Country of isolation</b>  | South Africa | 295 | 24.50 |
|                              | Georgia      | 160 | 13.29 |
|                              | Moldova      | 135 | 11.21 |
|                              | Vietnam      | 68  | 5.65  |
|                              | Azerbaijan   | 57  | 4.73  |
|                              | Bangladesh   | 46  | 3.82  |
|                              | Romania      | 37  | 3.07  |
|                              | Djibouti     | 31  | 2.57  |
|                              | Ivory Coast  | 29  | 2.41  |
|                              | India        | 28  | 2.33  |
|                              | Nigeria      | 27  | 2.24  |
|                              | Thailand     | 24  | 1.99  |
|                              | Peru         | 23  | 1.91  |
|                              | China        | 23  | 1.91  |
|                              | Tanzania     | 17  | 1.41  |
|                              | Other        | 49  | 4.07  |
|                              | NA           | 155 | 12.87 |
| <b>Year of isolation</b>     | 2016         | 53  | 4.40  |
|                              | 2015         | 254 | 21.10 |
|                              | 2014         | 106 | 8.80  |
|                              | 2013         | 147 | 12.21 |
|                              | 2012         | 86  | 7.14  |
|                              | 2011         | 60  | 4.98  |
|                              | 2010         | 87  | 7.23  |
|                              | 2009         | 65  | 5.40  |
|                              | 2008         | 27  | 2.24  |
|                              | 2007         | 11  | 0.91  |
|                              | 2006         | 6   | 0.50  |
|                              | 2005         | 14  | 1.16  |
|                              | 2004         | 6   | 0.50  |
|                              | 2003         | 1   | 0.08  |
|                              | 1996         | 1   | 0.08  |
|                              | NA           | 280 | 23.26 |
| <b>Source of the isolate</b> | Sputum       | 833 | 69.19 |
|                              | Morgue       | 167 | 13.87 |
|                              | Other        | 6   | 0.50  |
|                              | NA           | 198 | 16.45 |

NA: not available

**Table 2. Characteristics of the 131 multi- and extensively drug-resistant *Mycobacterium tuberculosis* isolates from Germany analyzed in this study.** We found demographic information, epidemiological information and drug susceptibility test- results in the German TB surveillance system for 129/131 isolates.

| Characteristic                        |                         | n         | %     |
|---------------------------------------|-------------------------|-----------|-------|
| Molecular drug resistance prediction  | MDR                     | 111       | 84.73 |
|                                       | XDR                     | 16        | 12.21 |
|                                       | Non MDR non XDR         | 4         | 3.05  |
| Phenotypic drug Resistance prediction | MDR                     | 122       | 93.13 |
|                                       | XDR                     | 7         | 5.34  |
|                                       | NA                      | 2         | 1.53  |
| Year of isolation                     | 2013                    | 80        | 61.07 |
|                                       | 2012                    | 50        | 38.17 |
|                                       | 2014                    | 1         | 0.76  |
| Federal state of isolation            | North Rhine- Westphalia | 32        | 24.43 |
|                                       | Bavaria                 | 13        | 9.92  |
|                                       | Baden- Württemberg      | 15        | 11.45 |
|                                       | Saxony                  | 10        | 7.63  |
|                                       | Lower Saxony            | 10        | 7.63  |
|                                       | Berlin                  | 10        | 7.63  |
|                                       | Hamburg                 | 8         | 6.11  |
|                                       | Hesse                   | 8         | 6.11  |
|                                       | Schleswig-Holstein      | 5         | 3.82  |
|                                       | Saxony-Anhalt           | 5         | 3.82  |
|                                       | Other                   | 11        | 8.40  |
|                                       | NA                      | 4         | 3.05  |
| Patient age                           | Median                  | 34 (2-83) |       |
|                                       | Mean                    | 35.73     |       |
| Patient gender                        | Male                    | 79        | 60.31 |
|                                       | Female                  | 50        | 38.17 |
|                                       | NA                      | 2         | 1.53  |
| Patient citizenship                   | Germany                 | 30        | 22.90 |
|                                       | Russia                  | 25        | 19.08 |
|                                       | India                   | 8         | 6.11  |
|                                       | Georgia                 | 7         | 5.34  |
|                                       | Romania                 | 7         | 5.34  |
|                                       | Kazakhstan              | 6         | 4.58  |
|                                       | Ukraine                 | 5         | 3.82  |
|                                       | other                   | 39        | 29.78 |
|                                       | NA                      | 4         | 3.05  |
| Patient country of birth              | Russia                  | 27        | 20.61 |
|                                       | Germany                 | 19        | 14.50 |
|                                       | Romania                 | 10        | 7.63  |
|                                       | Ukraine                 | 8         | 6.11  |
|                                       | India                   | 8         | 6.11  |
|                                       | Kazakhstan              | 8         | 6.11  |
|                                       | Georgia                 | 7         | 5.34  |
|                                       | Other                   | 41        | 31.30 |
|                                       | NA                      | 3         | 2.29  |

MDR: multidrug-resistant; XDR: extensively drug-resistant; NA: not available

**Table 3. Characteristics of the 11 molecular clusters identified in this study which contain at least one isolate from Germany and at least one isolate from another country.** In bold the isolates from Germany. Within each cluster, information about the country of birth, the nationality and the federal state of isolation of the German isolates is provided.

| Cluster name | No. of isolates in the cluster | No. of MDR | Country of isolation of MDR (n)                             | No. of XDR | Country of isolation of XDR (n)   | Characteristics of the German isolates within the clusters |                            |
|--------------|--------------------------------|------------|-------------------------------------------------------------|------------|-----------------------------------|------------------------------------------------------------|----------------------------|
|              |                                |            |                                                             |            |                                   | Patient country of birth (n)                               | Patient nationality (n)    |
| 2            | 56                             | 55         | Moldova (49)<br><b>Germany (2)</b><br>Georgia (1)<br>NA (3) | 1          | Moldova (1)                       | Romania (1)<br>Germany (1)                                 | Romania (1)<br>Germany (1) |
| 5            | 30                             | 12         | South Africa (11)<br><b>Germany (1)</b>                     | 18         | South Africa (18)                 | Abroad (1)                                                 | Abroad (1)                 |
| 9            | 18                             | 18         | Georgia (16)<br><b>Germany (2)</b>                          | 0          | 0                                 | Georgia (1)<br>Romania (1)                                 | Georgia (1)<br>Germany (1) |
| 13           | 10                             | 1          | <b>Germany (1)</b>                                          | 9          | Kazakhstan (9)                    | Kazakhstan (1)                                             | Germany (1)                |
| 21           | 6                              | 6          | Georgia (5)<br><b>Germany (1)</b>                           | 0          | 0                                 | Syria (1)                                                  | Syria (1)                  |
| 24           | 5                              | 5          | Georgia (3)<br><b>Germany (2)</b>                           | 0          | 0                                 | Georgia (2)                                                | Georgia (2)                |
| 35           | 4                              | 1          | Georgia (1)                                                 | 3          | Georgia (2)<br><b>Germany (1)</b> | Georgia (1)                                                | Georgia (1)                |
| 53           | 3                              | 2          | Romania (1)<br><b>Germany (1)</b>                           | 1          | Romania (1)                       | Romania (1)                                                | Romania (1)                |
| 58           | 3                              | 3          | India (2)<br><b>Germany (1)</b>                             | 0          | 0                                 | India (1)                                                  | India (1)                  |
| 59           | 3                              | 3          | Georgia (1)<br><b>Germany (2)</b>                           | 0          | 0                                 | Georgia (1)<br>Ukraine(1)                                  | Georgia (1)<br>Ukraine(1)  |
| 103          | 2                              | 2          | Georgia (1)<br><b>Germany (1)</b>                           | 0          | 0                                 | Georgia (1)                                                | Georgia (1)                |

MDR: multidrug-resistant; XDR: extensively drug-resistant; NA: not available

## Figures

**Figure 1. Flowchart of the inclusion and exclusion of isolates in our study from the public and the German dataset.** The final dataset included 1,335 isolates: 1,204 from the public and 131 from the German dataset.

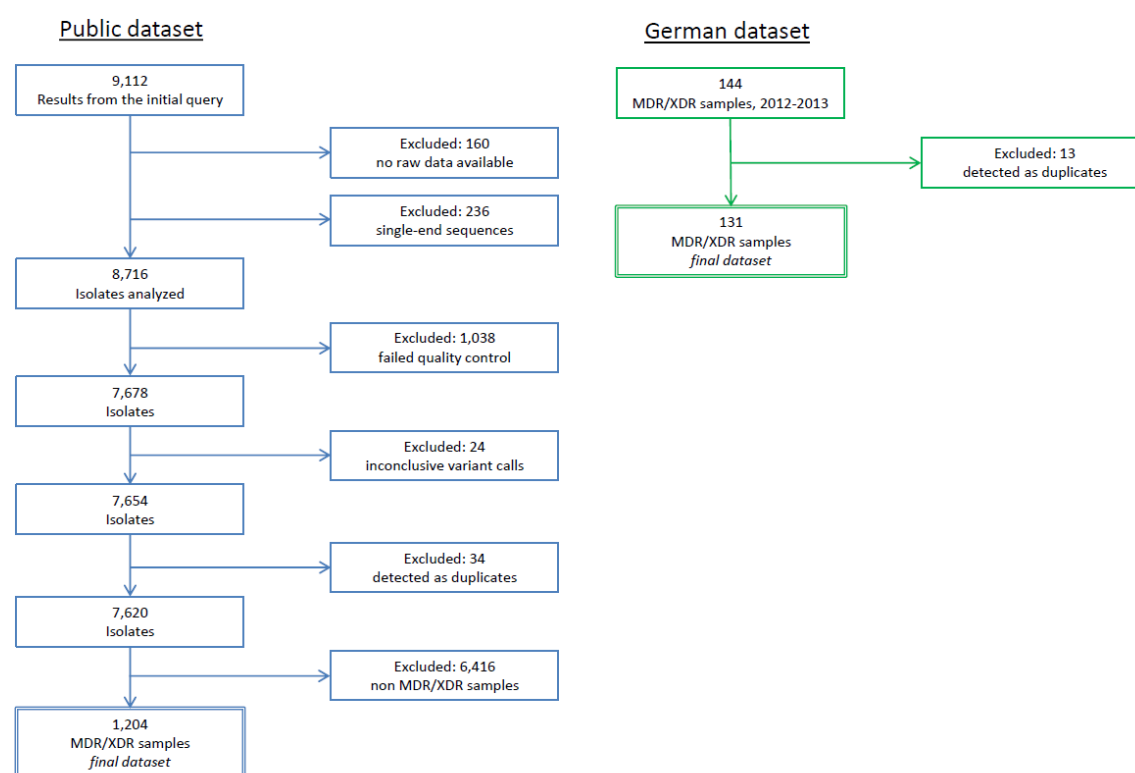

**Figure 2. Visualization of the transmission cluster2 (N=56) identified among the 1,335**

***Mycobacterium tuberculosis* isolates analyzed in our study.** The country of isolation, multi- and extensive drug-resistance classification and year of isolation are represented in the clusters. SNP distances were calculated for each pair of isolates individually. Links with less than 6 SNPs are marked black, those with less than 13 SNPs are marked in grey. Connections with 13 SNPs or more than are not shown in the network.

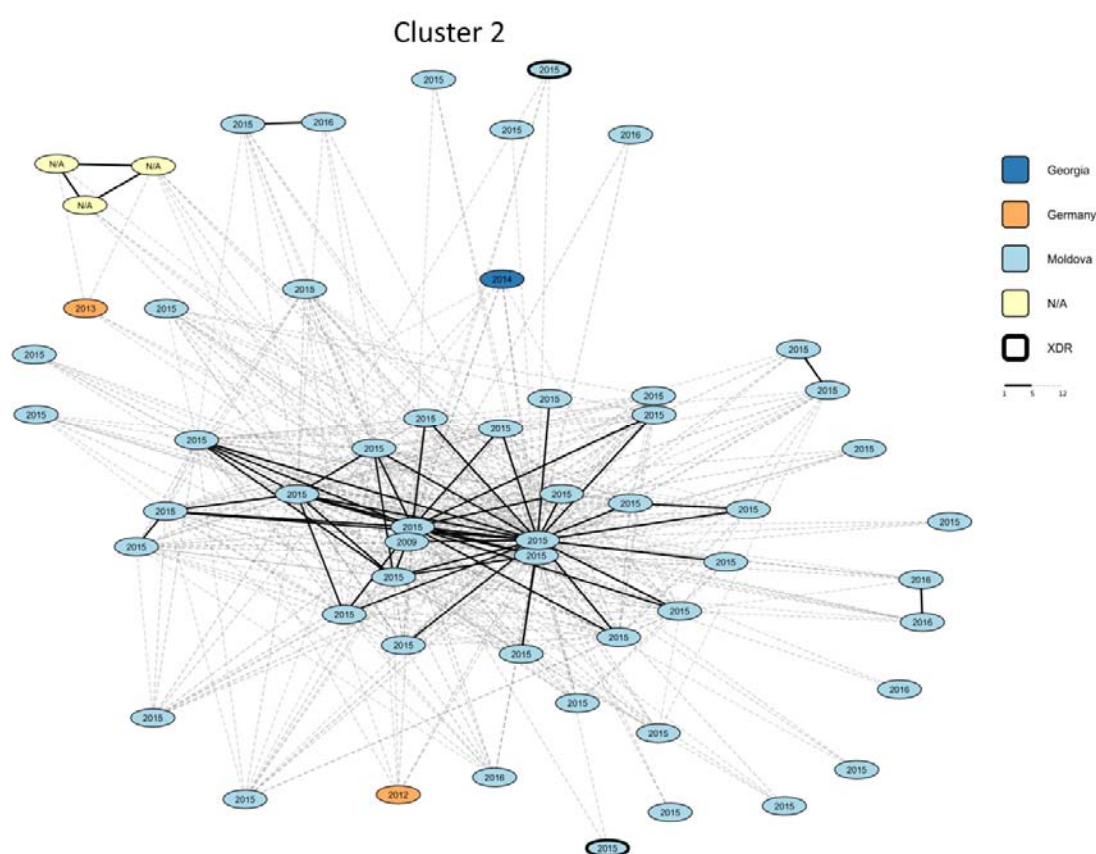

Source: https://www.biorxiv.org/content/10.1101/834150v1.full.pdf
